# Supplementary material
Source: PubMed Central journal article supplement (PMC3209207)
Supplement: supp_193.22.6171_FigS1.pdf [file supp_193.22.6171_FigS1.pdf]

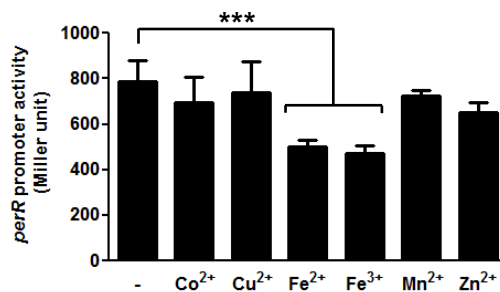

**Supplemental Figure 1.** Effects of metal ions on *perR* transcription in the presence of hydrogen peroxide. Metal ions (20  $\mu\text{M}$   $\text{CoCl}_2$ , 20  $\mu\text{M}$   $\text{CuCl}_2$ , 40  $\mu\text{M}$   $\text{FeSO}_4$ , 40  $\mu\text{M}$   $\text{Fe}_2(\text{SO}_4)_3$ , 40  $\mu\text{M}$   $\text{MnCl}_2$ , or 10  $\mu\text{M}$   $\text{ZnCl}_2$ ) were added to MEM $\alpha$ . *C. jejuni* cultures were grown for 7 h, and then exposed to 1 mM hydrogen peroxide for 1 h prior to the assay. “-” indicates the negative control without any metal ions tested. The results show the means and standard deviations of three independent experiments. \*\*\*:  $P < 0.001$ ; the significance of results was statistically analyzed by one-way ANOVA analysis of variance with Dunnett’s post-tests at a 95% confidence interval using Prism software (version 5.01; GraphPad Software Inc.).
